# Supplementary material for: What We Know about Sting-Related Deaths? Human Fatalities Caused by Hornet, Wasp and Bee Stings in Europe (1994–2016)
Source: MDPI journal article supplement (doi:10.3390/biology11020282), 2022-02-11
Supplement: s1 [file s1]

**Supplementary Table S2.** List of all European countries (n=32) analyzed in the present study with their country code, dataset range and number of datasets.

| Country                | Country code <sup>1</sup> | Dataset range<br>(year), first–last | Number of datasets |
|------------------------|---------------------------|-------------------------------------|--------------------|
| Austria                | AT                        | 2002-2016                           | 15                 |
| Belgium                | BE                        | 1998-2015                           | 18                 |
| Bosnia and Herzegovina | BA                        | 2011                                | 1                  |
| Bulgaria               | BG                        | 2005-2013                           | 9                  |
| Croatia                | HR                        | 1995-2013                           | 19                 |
| Czechia                | CZ                        | 1994-2016                           | 23                 |
| Estonia                | EE                        | 1997-2013                           | 17                 |
| Finland                | FI                        | 1996-2015                           | 20                 |
| France                 | FR                        | 2000-2014                           | 15                 |
| Germany                | DE                        | 1998-2015                           | 18                 |
| Greece                 | EL                        | 2014-2015                           | 2                  |
| Hungary                | HU                        | 1996-2016                           | 21                 |
| Iceland                | IS                        | 1996-2016                           | 21                 |
| Ireland                | IE                        | 2007-2013                           | 8                  |
| Italy                  | IT                        | 2003-2015                           | 13                 |
| Latvia                 | LV                        | 1996-2004                           | 9                  |
| Lithuania              | LT                        | 1998-2004                           | 7                  |
| Luxembourg             | LU                        | 1998-2004                           | 7                  |
| Malta                  | MT                        | 1995-2004                           | 10                 |
| Montenegro             | ME                        | 1999-2004                           | 5                  |
| Netherlands            | NL                        | 1996-2016                           | 21                 |
| Norway                 | NO                        | 1996-2015                           | 20                 |
| Poland                 | PL                        | 1999-2015                           | 17                 |
| Portugal               | PT                        | 2002-2014                           | 13                 |
| Romania                | RO                        | 1999-2016                           | 18                 |
| Serbia                 | RS                        | 1998-2015                           | 18                 |
| Slovakia               | SK                        | 1994-2014                           | 21                 |
| Slovenia               | SI                        | 1997-2015                           | 19                 |
| Spain                  | ES                        | 1999-2015                           | 17                 |
| Sweden                 | SE                        | 1997-2016                           | 20                 |
| Switzerland            | CH                        | 1995-2015                           | 21                 |
| United Kingdom         | UK                        | 2001-2015                           | 15                 |

<sup>1</sup> Based on the ISO 3166-1 alpha-2 code [24].
