# Supplementary material for: What We Know about Sting-Related Deaths? Human Fatalities Caused by Hornet, Wasp and Bee Stings in Europe (1994–2016)
Source: MDPI journal article supplement (doi:10.3390/biology11020282), 2022-02-11
Supplement: s1 [file s1]

**Supplementary Table S6.** Hymenopteran sting-related mortality rates (X23MR) during the studied period (1994-2016) calculated on the basis of the yearly population size of each country as reported on the census, as of 1 January of each year. The X23MR are expressed per year and per 1,000,000 inhabitants.

|           | 1994 | 1995 | 1996 | 1997 | 1998 | 1999 | 2000 | 2001 | 2002 | 2003 | 2004 | 2005 | 2006 | 2007 | 2008 | 2009 | 2010 | 2011 | 2012 | 2013 | 2014 | 2015 | 2016 | Min  | Max  | Standard deviation | Average |
|-----------|------|------|------|------|------|------|------|------|------|------|------|------|------|------|------|------|------|------|------|------|------|------|------|------|------|--------------------|---------|
| <b>AT</b> |      |      |      |      |      |      |      |      | 0    | 0.25 | 0.38 | 0.63 | 1.51 | 0.88 | 0.62 | 0.87 | 0.62 | 1.23 | 0.37 | 0.12 | 0.61 | 0.24 | 0.72 | 0    | 1.51 | 0.41               | 0.6     |
| <b>BE</b> |      |      |      |      | 0.1  | 0    | 0.1  | 0.1  | 0.19 | 0.19 | 0.39 | 0.1  | 0    | 0.1  | 0    | 0.49 | 0    | 0.19 | 0    | 0.29 | 0.19 | 0.19 |      | 0    | 0.49 | 0.14               | 0.15    |
| <b>BA</b> |      |      |      |      |      |      |      |      |      |      |      |      |      |      |      |      |      | 0    |      |      |      |      |      | 0    | 0    | 0                  | 0       |
| <b>BG</b> |      |      |      |      |      |      |      |      |      |      |      | 0.13 | 0.26 | 0.4  | 0.67 | 0.27 | 0.27 | 0.27 | 0.41 | 0.82 |      |      |      | 0.13 | 0.82 | 0.22               | 0.39    |
| <b>HR</b> |      | 0.43 | 0.22 | 0.66 | 0    | 0    | 0.22 | 0.23 | 0.23 | 0.7  | 0.23 | 0    | 0.46 | 0.23 | 0.46 | 0.93 | 0.46 | 0    | 1.4  | 1.17 |      |      |      | 0    | 1.4  | 0.4                | 0.42    |
| <b>CZ</b> | 0.39 | 0.39 | 0.68 | 0.68 | 0.87 | 0.29 | 0.39 | 0.59 | 0    | 1.37 | 0.29 | 0.29 | 0.39 | 0.2  | 0.58 | 0.86 | 0.19 | 0.67 | 0.29 | 0.48 | 0.19 | 0.28 | 0.38 | 0    | 1.37 | 0.3                | 0.47    |
| <b>EE</b> |      |      |      | 0    | 0    | 0    | 0.71 | 0    | 2.17 | 0.73 | 0.73 | 0.74 | 0    | 0    | 2.24 | 0.75 | 0.75 | 0    | 1.51 | 0    |      |      |      | 0    | 2.24 | 0.75               | 0.61    |
| <b>FI</b> |      |      | 0    | 0.39 | 0    | 0.58 | 0    | 0.39 | 0.19 | 0.38 | 0.19 | 0    | 0.19 | 0    | 0    | 0    | 0.37 | 0.37 | 0.37 | 0.55 | 0.73 | 0    |      | 0    | 0.73 | 0.23               | 0.24    |
| <b>FR</b> |      |      |      |      |      |      | 0.17 | 0.18 | 0.16 | 0.23 | 0.37 | 0.32 | 0.16 | 0.19 | 0.22 | 0.22 | 0.23 | 0.22 | 0.23 | 0.14 | 0.3  |      |      | 0.14 | 0.37 | 0.06               | 0.22    |
| <b>DE</b> |      |      |      |      | 0.22 | 0.26 | 0.24 | 0.17 | 0.13 | 0.36 | 0.39 | 0.22 | 0.35 | 0.12 | 0.15 | 0.22 | 0.2  | 0.25 | 0.17 | 0.2  | 0.07 | 0.27 |      | 0.07 | 0.39 | 0.08               | 0.22    |
| <b>EL</b> |      |      |      |      |      |      |      |      |      |      |      |      |      |      |      |      |      |      |      |      | 0.37 | 0.46 |      | 0.37 | 0.46 | 0.07               | 0.41    |
| <b>HU</b> |      |      | 0.19 | 0.39 | 0.39 | 0.2  | 0.78 | 0.1  | 0.39 | 0.39 | 0.3  | 0.2  | 0.3  | 0.5  | 0.8  | 0.4  | 0    | 0.8  | 1.11 | 1.31 | 1.01 | 0.91 | 0.71 | 0    | 1.31 | 0.36               | 0.53    |
| <b>IS</b> |      |      | 0    | 0    | 0    | 0    | 0    | 0    | 0    | 0    | 0    | 0    | 0    | 0    | 0    | 0    | 0    | 0    | 0    | 0    | 0    | 0    | 0    | 0    | 0    | 0                  | 0       |
| <b>IE</b> |      |      |      |      |      |      |      |      |      |      |      |      | 0    | 0    | 0.22 | 0    | 0.22 | 0    | 0    | 0    | 0    |      |      | 0    | 0.22 | 0.1                | 0.05    |
| <b>IT</b> |      |      |      |      |      |      |      |      |      | 0.09 | 0.09 | 0.03 | 0.09 | 0.02 | 0.05 | 0.15 | 0.19 | 0.2  | 0.1  | 0.05 | 0.07 | 0.05 |      | 0.02 | 0.2  | 0.06               | 0.09    |
| <b>LV</b> |      |      | 0.81 | 0.82 | 0    | 0.42 | 0    | 0.85 | 0.86 | 0    | 0    |      |      |      |      |      |      |      |      |      |      |      |      | 0    | 0.86 | 0.42               | 0.42    |

|    |                           |      |      |      |      |      |      |      |      |      |      |      |      |      |      |      |      |      |      |      |      |      |      |      |      |      |
|----|---------------------------|------|------|------|------|------|------|------|------|------|------|------|------|------|------|------|------|------|------|------|------|------|------|------|------|------|
| LT | 0.28 1.13 0 0 0 0.29 0.29 |      |      |      |      |      |      |      |      |      |      |      |      |      |      |      |      |      |      |      | 0    | 1.13 | 0.4  | 0.29 |      |      |
| LU | 0 0 0 0 0 0 2.2           |      |      |      |      |      |      |      |      |      |      |      |      |      |      |      |      |      |      |      | 0    | 2.2  | 0.83 | 0.31 |      |      |
| MT | 0                         | 0    | 0    | 0    | 0    | 0    | 0    | 0    | 0    | 0    |      |      |      |      |      |      |      |      |      |      | 0    | 0    | 0    | 0    |      |      |
| ME |                           |      |      |      |      | 0    | 0    | 0    | 0    | 0    |      |      |      |      |      |      |      |      |      |      | 0    | 0    | 0    | 0    |      |      |
| NL | 0.32 0.06 0.06            |      |      | 0    | 0.13 | 0    | 0.06 | 0    | 0.06 | 0    | 0.06 | 0.12 | 0.06 | 0.06 | 0    | 0    | 0    | 0.12 | 0    | 0    | 0.12 | 0    | 0.32 | 0.08 | 0.06 |      |
| NO | 0.69 0.46 0.23            |      |      | 0.22 | 0.22 | 0.22 | 0.22 | 0.22 | 0.22 | 0    | 0    | 0.21 | 0    | 0.21 | 0.21 | 0    | 0.4  | 0    | 0.2  | 0.19 | 0    |      | 0.69 | 0.17 | 0.21 |      |
| PL |                           |      |      |      | 0.18 | 0.21 | 0.08 | 0.18 | 0.21 | 0.24 | 0.1  | 0.26 | 0.24 | 0.24 | 0.16 | 0.18 | 0.21 | 0.32 | 0.11 | 0.08 | 0.29 | 0.08 | 0.32 | 0.07 | 0.19 |      |
| PT |                           |      |      |      |      |      |      | 0.1  | 0    | 0    | 0    | 0    | 0.28 | 0.09 | 0    | 0    | 0    | 0    | 0    | 0.38 | 0    |      | 0.38 | 0.13 | 0.07 |      |
| RO |                           |      |      |      | 0.22 | 0.49 | 0.4  | 0.46 | 0.55 | 0.46 | 0.47 | 0.38 | 0.14 | 0.39 | 0.2  | 0.44 | 0.1  | 0.5  | 0.45 | 0.25 | 0.81 | 0.4  | 0.1  | 0.81 | 0.17 | 0.4  |
| RS | 0.13 0.26 0.4             |      |      | 0.4  | 0.27 | 0.67 | 0.54 | 0.13 | 0.4  | 0.27 | 0.41 | 0.68 | 0.55 | 0.83 | 0.42 | 0.28 | 0.42 | 0.14 | 0.13 |      |      | 0.83 | 0.2  | 0.4  |      |      |
| SK | 0.19                      | 0.19 | 0.37 | 0.19 | 0    | 0.19 | 0.19 | 0    | 0    | 0.37 | 0.19 | 0    | 0    | 0    | 0.19 | 0.37 | 0    | 0    | 0.37 | 0    | 0.37 | 0    |      | 0.37 | 0.15 | 0.15 |
| SI | 0.5                       |      |      | 0    | 0    | 0.5  | 0    | 0.5  | 1.5  | 0    | 0    | 0.5  | 1.49 | 0    | 1.48 | 0    | 1.46 | 0    | 0.49 | 0    | 1.94 | 0    |      | 1.94 | 0.67 | 0.55 |
| ES |                           |      |      |      | 0.1  | 0.07 | 0.1  | 0.12 | 0.12 | 0.05 | 0.09 | 0.07 | 0.02 | 0.02 | 0.13 | 0.04 | 0.09 | 0.06 | 0.04 | 0.17 | 0.06 | 0.02 |      | 0.17 | 0.04 | 0.08 |
| SE | 0.68 0.11 0.11            |      |      | 0.11 | 0    | 0.34 | 0.22 | 0.22 | 0    | 0.11 | 0.33 | 0.33 | 0.11 | 0.11 | 0.32 | 0.11 | 0.52 | 0.31 | 0.31 | 0.41 | 0    | 0.68 | 0.17 | 0.24 |      |      |
| CH | 0.57                      | 0.28 | 0.42 | 1.13 | 0.28 | 0.14 | 0.42 | 0.28 | 0.55 | 0.54 | 0.27 | 0.54 | 0.53 | 0.13 | 0.39 | 0.26 | 0.64 | 0.38 | 0.5  | 0.12 | 0.36 | 0.12 |      | 1.13 | 0.22 | 0.42 |
| UK |                           |      |      |      |      |      | 0.02 | 0.03 | 0.1  | 0.12 | 0.07 | 0.07 | 0.07 | 0.03 | 0.08 | 0.08 | 0.03 | 0.02 | 0.03 | 0.06 | 0.03 | 0.02 |      | 0.12 | 0.03 | 0.06 |
